# Supplementary material for: Surface functionality analysis by Boehm titration of graphene nanoplatelets functionalizedviaa solvent-free cycloaddition reaction
Source: Royal Society of Chemistry journal article supplement (doi:10.1039/c8na00280k), 2019-01-01
Supplement: c8na00280k1.pdf [file c8na00280k1.pdf]

## Electronic supplementary information

### Surface functionality analysis by Boehm titration of graphene nanoplatelets functionalized via a solvent-free cycloaddition reaction

He Ren,<sup>a+</sup> Eunice Cunha,<sup>b+</sup> Quanji Sun,<sup>a</sup> Zheling Li,<sup>b</sup> Ian A. Kinloch,<sup>b</sup> Robert J. Young,<sup>b\*</sup> and Zhaodong Fan<sup>a\*</sup>

<sup>a</sup> Beijing Institute of Aeronautical Materials (BIAM), Beijing, China

<sup>b</sup> National Graphene Institute and School of Materials, University of Manchester, Manchester M13 9PL, UK

\*Corresponding author: robert.young@manchester.ac.uk

fanzhaodong99@sohu.com

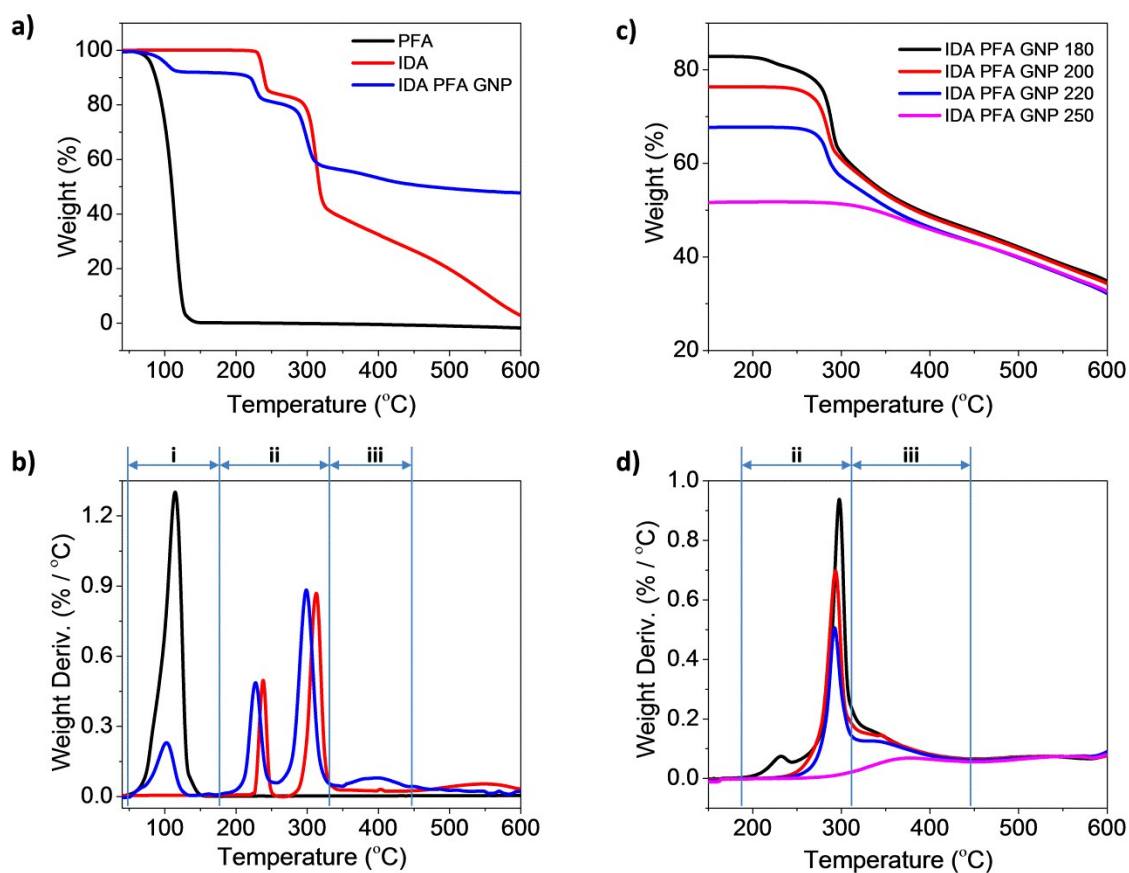

**Figure S 1:** Thermal gravimetric analysis under an N<sub>2</sub> stream of: a) PFA, IDA and IDA PFA GNP mixture; b) IDA PFA GNP mixture after isothermal processes of 5h at 180 °C, 200 °C, 220 °C and 250 °C; c) weight derivative against temperature of a); d) weight derivative against temperature of b).

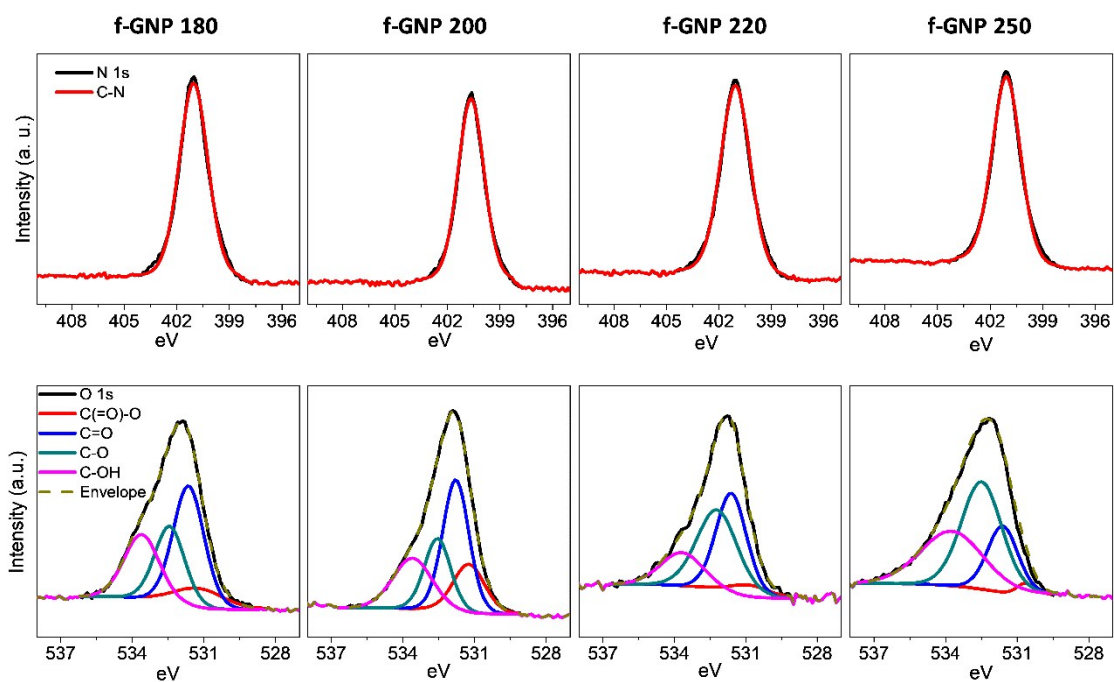

**Figure S 2:** N 1s and O1s high resolution spectra of the f-GNPs

**Table S 1:** Atomic concentration (%) of the O 1s components for the f-GNPs

|                  | <b>C(=O)-O</b> | <b>C=O</b> | <b>C-O</b> | <b>C-OH</b> |
|------------------|----------------|------------|------------|-------------|
| <b>f-GNP 180</b> | 10.29          | 40.47      | 24.77      | 24.47       |
| <b>f-GNP 200</b> | 17.35          | 39.19      | 2.19       | 22.27       |
| <b>f-GNP 220</b> | 5.59           | 37.37      | 39.81      | 17.22       |
| <b>f-GNP 250</b> | 1.71           | 20.20      | 43.75      | 34.34       |
